# Supplementary material
Source: PubMed Central journal article supplement (PMC3241587)
Supplement: supp_mcr267_mcr267supp.pdf [file supp_mcr267_mcr267supp.pdf]

SUPPLEMENTARY DATA

TABLE S1. Sampled taxa, their genome sizes, GC contents, seed masses, stomatal lengths, flowering phenology and duration of their growing season

| Species                               | Genome size 2C [Mbp] | CV genome size [%] | GC content [%] | Standard used               | Ratio PI | Ratio DAPI | Seed mass [mg] | Stomatal length [ $\mu$ m] | Flowers from [month] | Flowers to [month] | Growing season duration [months] | EIV-light | EIV-temperature | EIV-continentiality | EIV-moisture | EIV-soil pH | EIV-nitrogen | Sample origin                       |
|---------------------------------------|----------------------|--------------------|----------------|-----------------------------|----------|------------|----------------|----------------------------|----------------------|--------------------|----------------------------------|-----------|-----------------|---------------------|--------------|-------------|--------------|-------------------------------------|
| <i>Acanthus mollis</i>                | 1910                 | 0.35               | 40.47          | <i>Carex acutiformis</i>    | 2.388    | 1.954      |                | 42.08                      | 3                    | 6                  |                                  | 7         | 8               | 4                   | 3            | 5           | 4            | 43° 8'33.44"N, 5°55'3.71"E          |
| <i>Acorus calamus</i>                 | 1114                 | 0.18               | 39.85          | <i>Solanum lycopersicum</i> | 0.657    | 0.620      |                |                            | 5                    | 6                  | 8                                | 8         | 6               | 5                   | 10           | 7           | 7            | Botanical garden Masaryk Univ. Brno |
| <i>Adoxa moschatellina</i>            | 40213                | 1.04               | 37.57          | <i>Leucosium aestivum</i>   | 0.653    | 0.835      |                | 68.36                      | 3                    | 5                  | 2                                | 5         | 4               | 5                   | 6            | 7           | 8            | 49° 6'57.67"N, 16°38'1.69"E         |
| <i>Aetheorhiza bulbosa</i>            | 1303                 | 0.76               | 37.48          | <i>Solanum lycopersicum</i> | 0.768    | 0.817      |                | 23.67                      | 3                    | 6                  |                                  | 7         | 8               | 4                   | 3            | 5           | 3            | 43°20'54.50"N, 4°47'22.30"E         |
| <i>Allium ampeloprasum</i>            | 62558                | 1.04               | 36.84          | <i>Vicia faba</i>           | 2.688    | 3.342      |                |                            | 4                    | 6                  |                                  | 7         | 7               | 5                   | 3            | 6           | 5            | 40°33.742"N, 14°53.850"E            |
| <i>Allium cirrhosum</i>               | 35452                | 1.66               | 39.70          | <i>Vicia faba</i>           | 1.523    | 1.643      |                |                            | 7                    | 9                  | 5                                | 7         | 6               | 4                   | 3            | 6           | 4            | 43°30'30.37"N, 6°53'34.14"E         |
| <i>Allium flavum</i>                  | 23938                | 0.97               | 41.17          | <i>Pisum sativum</i>        | 3.053    | 3.152      | 1.08           | 32.84                      | 6                    | 8                  | 5                                | 8         | 5               | 5                   | 3            | 5           | 3            | 49°13'6.433"N, 16°40'34.659"E       |
| <i>Allium chamaemoly</i>              | 28181                | 0.75               | 38.47          | <i>Vicia faba</i>           | 1.211    | 1.390      |                |                            | 2                    | 4                  |                                  | 8         | 10              | 4                   | 2            | 4           | 2            | 41°51.753"N, 16°02.396"E            |
| <i>Allium nigrum</i>                  | 51315                | 0.56               | 38.42          | <i>Vicia faba</i>           | 2.205    | 2.536      |                |                            | 4                    | 5                  |                                  | 10        | 9               | 4                   | 3            | 6           | 4            | 39°21.120"N, 16°11.009"E            |
| <i>Allium oleraceum</i>               | 56611                | 0.23               | 40.04          | <i>Vicia faba</i>           | 2.432    | 2.577      |                | 31.89                      | 7                    | 9                  | 6                                | 7         | 8               | 5                   | 3            | 5           | 5            | 49°53'0.627"N, 14°6'35.737"E        |
| <i>Allium orientale</i>               | 36350                | 1.31               | 38.97          | <i>Vicia faba</i>           | 1.562    | 1.748      | 1.90           | 27.62                      | 3                    | 4                  |                                  |           |                 |                     |              |             |              | 37°35'58.88"N, 30°51'37.82"E        |
| <i>Allium pendulinum</i>              | 36992                | 0.72               | 44.52          | <i>Vicia faba</i>           | 1.590    | 1.320      |                |                            | 4                    | 6                  |                                  | 6         | 9               | 4                   | 4            | 6           | 8            | 39°19.900"N, 16°04.084"E            |
| <i>Allium senescens ssp. montanum</i> | 42754                | 0.82               | 39.82          | <i>Vicia faba</i>           | 1.837    | 1.968      |                | 28.87                      | 6                    | 7                  | 7                                |           |                 |                     |              |             |              | 48°53'41.536"N, 15°49'8.379"E       |
| <i>Allium siculum</i>                 | 59962                | 1.97               | 37.61          | <i>Vicia faba</i>           | 2.576    | 3.084      |                | 36.69                      | 5                    | 6                  |                                  | 5         | 7               | 4                   | 3            | 4           | 6            | Botanical garden Masaryk Univ. Brno |
| <i>Allium subhirsutum</i>             | 27502                | 0.71               | 37.93          | <i>Vicia faba</i>           | 1.182    | 1.393      | 1.16           |                            | 3                    | 5                  |                                  | 8         | 9               | 4                   | 2            | 4           | 2            | 43° 8'51.69"N, 5°55'37.42"E         |
| <i>Allium triquetrum</i>              | 33447                | 0.58               | 39.12          | <i>Vicia faba</i>           | 1.437    | 1.596      | 5.32           |                            | 2                    | 4                  |                                  | 6         | 9               | 4                   | 4            | 4           | 7            | 43°28.447"N, 10°19.847"E            |
| <i>Allium ursinum</i>                 | 56501                | 1.14               | 35.75          | <i>Vicia faba</i>           | 2.428    | 3.178      |                |                            | 4                    | 5                  | 3                                | 2         |                 | 5                   | 6            | 7           | 8            | Botanical garden Masaryk Univ. Brno |
| <i>Allium vineale</i>                 | 38285                | 0.69               | 39.15          | <i>Vicia faba</i>           | 1.645    | 1.824      |                | 24.41                      | 5                    | 7                  | 6                                | 8         | 7               | 5                   | 4            |             | 7            | 49°53'0.627"N, 14°6'35.737"E        |
| <i>Androcymbium palaestinum</i>       | 5671                 | 0.80               | 46.30          | <i>Epipremnum aureum</i>    | 0.726    | 0.591      |                | 39.06                      |                      |                    |                                  |           |                 |                     |              |             |              | 31° 49' 27.5"N, 35° 23' 59.4"E      |
| <i>Anemone apennina</i>               | 26454                | 0.63               | 42.22          | <i>Vicia faba</i>           | 1.137    | 1.073      |                |                            | 3                    | 5                  | 3                                | 5         | 5               | 6                   | 4            | 5           | 5            | 39°17.614"N, 16°06.712"E            |
| <i>Anemone coronaria</i>              | 21874                | 1.06               | 40.08          | <i>Epipremnum aureum</i>    | 2.799    | 3.219      | 0.76           |                            | 1                    | 3                  | 3                                | 8         | 8               | 4                   | 4            | 4           | 3            | 38°53'7.84"N, 16°37'57.32"E         |
| <i>Anemone hortensis</i>              | 23495                | 0.11               | 41.96          | <i>Epipremnum aureum</i>    | 3.006    | 3.131      |                |                            | 1                    | 4                  | 3                                | 8         | 8               | 5                   | 4            | 4           | 3            | 40°22.623"N, 15°00.494"E            |
| <i>Anemone narcissiflora</i>          | 17551                | 0.19               | 41.57          | <i>Epipremnum aureum</i>    | 2.246    | 2.388      |                | 39.48                      | 5                    | 7                  |                                  | 8         | 2               | 7                   | 5            | 7           | 4            | Botanical garden Masaryk Univ. Brno |
| <i>Anemone nemorosa</i>               | 37017                | 1.25               | 44.25          | <i>Vicia faba</i>           | 1.591    | 1.341      |                | 58.99                      | 2                    | 5                  | 3                                |           |                 | 4                   |              | 5           |              | 49°13'13.725"N, 16°40'37.638"E      |
| <i>Anemone ranunculoides</i>          | 32473                | 1.48               | 43.96          | <i>Vicia faba</i>           | 1.395    | 1.196      | 2.90           | 51.75                      | 2                    | 5                  | 3                                | 3         | 6               | 4                   | 6            | 8           | 8            | 49°13'22.715"N, 16°40'38.535"E      |
| <i>Anthericum ramosum</i>             | 5519                 | 0.44               | 43.52          | <i>Epipremnum aureum</i>    | 0.706    | 0.675      | 4.62           | 27.07                      | 5                    | 7                  | 5                                | 6         | 5               | 4                   | 4            | 7           | 4            | Botanical garden Masaryk Univ. Brno |
| <i>Arisaema flavum</i>                | 9919                 | 0.30               | 47.93          | <i>Ruscus aculeatus</i>     | 0.493    | 0.357      |                |                            |                      |                    |                                  |           |                 |                     |              |             |              | Praha-Trója Botanical Garden        |
| <i>Arisarum simorrhinum</i>           | 29289                | 0.26               | 46.66          | <i>Ruscus aculeatus</i>     | 1.454    | 1.138      |                | 55.39                      | 1                    | 3                  |                                  |           |                 |                     |              |             |              | Praha-Trója Botanical Garden        |
| <i>Arisarum vulgare</i>               | 28533                | 0.57               | 46.42          | <i>Vicia faba</i>           | 1.226    | 0.911      |                | 61.90                      | 10                   | 5                  |                                  | 6         | 8               | 4                   | 4            | 4           | 4            | 40°13.271"N, 14°58.534"E            |
| <i>Aristolochia rotunda</i>           | 582                  | 0.12               | 39.61          | <i>Carex acutiformis</i>    | 0.728    | 0.623      |                | 28.95                      | 4                    | 6                  |                                  | 6         | 7               | 5                   | 4            | 6           | 3            | 38°52.553"N, 16°37.956"E            |
| <i>Arum concinatum</i>                | 23445                | 0.27               | 44.97          | <i>Epipremnum aureum</i>    | 3.000    | 2.640      |                | 52.92                      |                      |                    |                                  |           |                 |                     |              |             |              | Praha-Trója Botanical Garden        |
| <i>Arum cylindraceum</i>              | 8871                 | 1.53               | 46.51          | <i>Vicia faba</i>           | 0.381    | 0.282      |                |                            | 4                    | 5                  | 2                                |           |                 |                     |              |             |              | 48°50'30.72"N, 17°34'49.575"E       |
| <i>Arum dioscoridis var. cyprinum</i> | 20751                | 0.73               | 45.42          | <i>Epipremnum aureum</i>    | 2.655    | 2.277      |                | 54.84                      |                      |                    |                                  |           |                 |                     |              |             |              | Praha-Trója Botanical Garden        |
| <i>Arum hygrophilum</i>               | 20443                | 0.07               | 42.51          | <i>Epipremnum aureum</i>    | 2.616    | 2.643      |                | 56.28                      | 2                    | 5                  |                                  |           |                 |                     |              |             |              | Praha-Trója Botanical Garden        |
| <i>Arum italicum</i>                  | 24763                | 0.64               | 46.10          | <i>Pisum sativum</i>        | 3.158    | 2.473      |                | 56.90                      | 3                    | 5                  |                                  | 6         | 8               | 4                   | 4            | 5           | 5            | 40°49'44.73"N, 14°23'42.41"E        |
| <i>Asparagus acutifolius</i>          | 5192                 | 1.55               | 41.55          | <i>Solanum lycopersicum</i> | 0.662    | 2.357      |                | 29.59                      | 8                    | 9                  |                                  | 6         | 9               | 4                   | 2            | 5           | 5            | 40°49'31.00"N, 14°23'37.16"E        |
| <i>Asparagus densiflorus</i>          | 4278                 | 1.28               | 40.50          | <i>Solanum lycopersicum</i> | 2.521    | 2.301      |                |                            |                      |                    |                                  |           |                 |                     |              |             |              | Cultivated plants of unknown origin |
| <i>Asparagus officinalis</i>          | 6541                 | 1.21               | 40.35          | <i>Solanum lycopersicum</i> | 3.855    | 3.547      |                |                            | 5                    | 6                  | 6                                | 8         | 8               | 5                   | 5            | 5           | 5            | 49°12'41.772"N, 16°35'50.199"E      |
| <i>Asparagus tenuifolius</i>          | 3007                 | 0.22               | 42.19          | <i>Solanum lycopersicum</i> | 1.772    | 1.479      |                |                            | 5                    | 6                  |                                  | 6         | 7               | 6                   | 4            | 6           | 5            | Praha-Trója Botanical Garden        |
| <i>Asphodeline lutea</i>              | 7109                 | 1.84               | 46.74          | <i>Vicia faba</i>           | 0.305    | 0.223      | 14.30          |                            | 4                    | 5                  |                                  | 11        | 6               | 6                   | 2            | 6           | 3            | 41°47.466"N, 15°58.756"E            |
| <i>Asphodelus microcarpus</i>         | 6553                 | 1.18               | 42.34          | <i>Epipremnum aureum</i>    | 0.839    | 0.855      |                |                            | 3                    | 5                  |                                  | 10        | 9               | 4                   | 2            | 3           | 5            | 42°11.139"N, 11°47.226"E            |

|                                                |       |      |       |                             |       |       |       |       |    |    |    |    |   |   |   |   |   |  |                                                          |
|------------------------------------------------|-------|------|-------|-----------------------------|-------|-------|-------|-------|----|----|----|----|---|---|---|---|---|--|----------------------------------------------------------|
| <i>Begonia grandis</i>                         | 1086  | 0.15 | 40.31 | <i>Solanum lycopersicum</i> | 0.640 | 0.590 |       | 47.22 |    |    |    |    |   |   |   |   |   |  | Praha-Trója Botanical Garden                             |
| <i>Bellevalia desertorum</i>                   | 48002 | 4.50 | 43.13 | <i>Ruscus aculeatus</i>     | 2.384 | 2.287 |       | 37.25 |    |    |    |    |   |   |   |   |   |  | 31° 49' 27.5"N, 35° 23' 59.4"E                           |
| <i>Bellevalia pycnantha</i>                    | 21910 | 4.92 | 44.42 | <i>Epipremnum aureum</i>    | 2.803 | 2.547 |       | 54.00 |    |    |    |    |   |   |   |   |   |  | Cultivated plants of unknown origin                      |
| <i>Bellevalia romana</i>                       | 18763 | 0.00 | 46.65 | <i>Epipremnum aureum</i>    | 2.401 | 1.914 |       |       | 3  | 5  | 8  | 7  | 5 | 3 | 6 | 4 |   |  | 40°22.695'N, 15°00.497'E                                 |
| <i>Bellis sylvestris</i>                       | 3991  | 1.23 | 39.18 | <i>Epipremnum aureum</i>    | 0.511 | 0.615 |       | 39.46 | 9  | 6  | 5  | 8  | 4 | 3 | 3 | 3 |   |  | 32° 45' 17.5"N, 35° 1' 43.1"E                            |
| <i>Biarum olivieri</i>                         | 6688  | 0.54 | 45.53 | <i>Epipremnum aureum</i>    | 0.856 | 0.729 |       | 40.40 |    |    |    |    |   |   |   |   |   |  | 31° 49' 27.5"N, 35° 23' 59.4"E                           |
| <i>Biarum tenuifolium</i>                      | 6755  | 0.90 | 45.45 | <i>Epipremnum aureum</i>    | 0.864 | 0.740 |       | 36.46 | 10 | 6  | 6  | 7  | 3 | 4 | 4 | 3 |   |  | 39°42.982'N, 16°05.102'E                                 |
| <i>Botrychium lunaria</i>                      | 23715 | 0.98 | 45.49 | <i>Epipremnum aureum</i>    | 3.034 | 2.591 |       | 41.37 | 6  | 8  | 7  | 3  | 6 | 4 |   | 2 |   |  | 49°22'57.063"N, 16°28'16.107"E                           |
| <i>Bowiea volubilis</i>                        | 3617  | 0.69 | 45.95 | <i>Epipremnum aureum</i>    | 0.463 | 0.385 | 2.88  | 40.44 |    |    |    |    |   |   |   |   |   |  | Cultivated plants of unknown origin                      |
| <i>Bryonia alba</i>                            | 5827  | 0.55 | 41.76 | <i>Pisum sativum</i>        | 0.743 | 0.744 |       |       | 5  | 7  | 7  | 8  | 7 | 6 | 5 | 8 | 4 |  | 49°13'45.141"N, 16°35'45.492"E                           |
| <i>Bryonia dioica</i>                          | 5522  | 1.82 | 39.98 | <i>Pisum sativum</i>        | 0.704 | 0.774 | 13.03 |       | 4  | 5  | 7  | 8  | 7 | 5 | 5 | 8 | 6 |  | 49°12'19.709"N, 16°35'39.109"E                           |
| <i>Bryonia verrucosa</i>                       | 4504  | 1.37 | 42.50 | <i>Pisum sativum</i>        | 0.574 | 0.552 | 36.09 | 28.01 | 5  | 9  |    |    |   |   |   |   |   |  | <a href="http://www.rareplants.de">www.rareplants.de</a> |
| <i>Camassia quamash</i>                        | 4258  | 1.09 | 42.27 | <i>Epipremnum aureum</i>    | 0.545 | 0.558 |       | 29.09 |    |    |    |    |   |   |   |   |   |  | Cultivated plants of unknown origin                      |
| <i>Cephalanthera damasonium</i>                | 33422 | 2.36 | 44.46 | <i>Vicia faba</i>           | 1.436 | 1.197 |       | 40.18 | 5  | 7  | 5  | 2  | 5 | 4 | 4 | 7 | 4 |  | 49°17'17.179"N, 16°33'27.302"E                           |
| <i>Cephalanthera longifolia</i>                | 31534 | 1.04 | 43.09 | <i>Ruscus aculeatus</i>     | 1.566 | 1.491 |       | 45.42 | 4  | 6  | 5  | 4  | 5 | 5 | 3 | 8 | 3 |  | 49°15'0.436"N, 17°40'35.107"E                            |
| <i>Cephalanthera rubra</i>                     | 30984 | 0.36 | 44.86 | <i>Ruscus aculeatus</i>     | 1.539 | 1.339 |       | 42.27 | 5  | 7  | 5  | 3  | 5 | 5 | 4 | 8 | 3 |  | 49°22'58.071"N, 16°28'3.104"E                            |
| <i>Colchicum arenarium</i>                     | 4756  | 1.26 | 44.95 | <i>Pisum sativum</i>        | 0.607 | 0.508 |       | 45.53 | 9  | 9  | 3  | 9  | 8 | 7 | 2 | 9 | 1 |  | 47°46'15.40"N, 18°31'11.53"E                             |
| <i>Colchicum autumnale</i>                     | 5833  | 0.53 | 46.71 | <i>Pisum sativum</i>        | 0.744 | 0.562 | 8.49  | 41.47 | 8  | 9  | 3  | 5  | 5 | 5 | 6 | 7 |   |  | 49°11'30.368"N, 17°31'0.638"E                            |
| <i>Colchicum cupanii</i>                       | 8754  | 0.85 | 43.01 | <i>Epipremnum aureum</i>    | 1.120 | 1.101 |       | 31.65 | 9  | 11 |    | 8  | 4 | 3 | 3 | 4 | 4 |  | 39°52.550'N, 16°09.758'E                                 |
| <i>Colchicum speciosum</i>                     | 5108  | 0.66 | 45.21 | <i>Pisum sativum</i>        | 0.651 | 0.538 |       |       | 9  | 10 |    |    |   |   |   |   |   |  | Botanical garden Masaryk Univ. Brno                      |
| <i>Convallaria majalis</i>                     | 33292 | 0.91 | 44.86 | <i>Vicia faba</i>           | 1.431 | 1.165 | 25.65 | 34.28 | 5  | 6  | 5  | 5  |   | 4 | 4 |   | 4 |  | 49°13'16.688"N, 16°40'17.529"E                           |
| <i>Corydalis cava</i>                          | 1870  | 0.48 | 41.50 | <i>Carex acutiformis</i>    | 2.337 | 1.812 | 5.69  | 24.45 | 3  | 5  | 2  | 3  | 6 | 4 | 6 | 8 | 8 |  | 49° 6'57.67"N, 16°38'1.69"E                              |
| <i>Corydalis intermedia</i>                    | 1395  | 0.49 | 41.36 | <i>Carex acutiformis</i>    | 1.743 | 1.362 |       | 29.42 | 4  | 6  | 2  | 3  | 5 | 4 | 5 | 5 | 6 |  | 49°31'32.347"N, 16°22'59.755"E                           |
| <i>Corydalis pumila</i>                        | 1173  | 0.45 | 40.90 | <i>Carex acutiformis</i>    | 1.467 | 1.174 | 1.65  | 18.31 | 4  | 5  | 2  | 3  | 4 | 5 | 5 | 5 | 6 |  | 48°56'0.15"N, 15°47'54.44"E                              |
| <i>Corydalis solida</i>                        | 1191  | 0.93 | 40.33 | <i>Carex acutiformis</i>    | 1.488 | 1.227 |       |       | 4  | 5  | 2  | 3  | 6 | 5 | 5 | 7 | 7 |  | 49° 6'57.67"N, 16°38'1.69"E                              |
| <i>Crinum asiaticum</i>                        | 40471 | 0.98 | 40.49 | <i>Vicia faba</i>           | 1.739 | 1.800 |       | 39.05 |    |    |    |    |   |   |   |   |   |  | Botanical garden Masaryk Univ. Brno                      |
| <i>Crinum moorei</i>                           | 54051 | 1.49 | 38.36 | <i>Vicia faba</i>           | 2.323 | 2.680 |       |       |    |    |    |    |   |   |   |   |   |  | Praha-Trója Botanical Garden                             |
| <i>Crocus pallasii</i>                         | 5836  | 0.38 | 45.23 | <i>Pisum sativum</i>        | 0.744 | 0.614 |       |       | 7  | 9  |    |    |   |   |   |   |   |  | 36°54'56.98"N, 30°3'31.48"E                              |
| <i>Cyclamen coum</i>                           | 13297 | 0.65 | 41.14 | <i>Pisum sativum</i>        | 0.577 | 0.605 |       |       | 3  | 5  |    |    |   |   |   |   |   |  | 33° 13' 21.5"N, 35° 44' 59.9"E                           |
| <i>Cyclamen graecum</i> ssp. <i>anatolicum</i> | 4521  | 1.29 | 40.87 | <i>Pisum sativum</i>        | 0.577 | 0.605 | 8.24  |       | 7  | 9  |    |    |   |   |   |   |   |  | 36°34'24.54"N, 30°19'28.41"E                             |
| <i>Cyclamen hederifolium</i>                   | 4730  | 1.07 | 41.78 | <i>Epipremnum aureum</i>    | 0.605 | 0.636 | 7.16  | 29.88 | 8  | 10 | 10 | 4  | 8 | 5 | 5 | 5 | 5 |  | 42°53.433'N, 11°05.306'E                                 |
| <i>Cyclamen purpurascens</i>                   | 5658  | 0.45 | 42.03 | <i>Epipremnum aureum</i>    | 0.724 | 0.751 |       | 28.84 | 8  | 9  | 10 | 4  | 6 | 4 | 5 | 9 | 5 |  | 49°13'21.80"N, 16°40'30.40"E                             |
| <i>Cypripedium calceolus</i>                   | 68313 | 3.35 | 43.29 | <i>Vicia faba</i>           | 2.935 | 2.613 |       | 55.43 | 5  | 6  |    | 5  | 4 | 6 | 4 | 8 | 6 |  | 49°11'24.57"N 16°30'11.05"E                              |
| <i>Cypripedium flavum</i>                      | 71359 | 0.90 | 43.19 | <i>Crinum asiaticum</i>     | 1.763 | 1.525 |       | 61.70 |    |    |    |    |   |   |   |   |   |  | Praha-Trója Botanical Garden                             |
| <i>Danaë racemosa</i>                          | 10625 | 1.23 | 41.72 | <i>Pisum sativum</i>        | 1.355 | 1.359 | 88.32 | 26.95 |    |    |    |    |   |   |   |   |   |  | Cultivated plants of unknown origin                      |
| <i>Datura innoxia</i>                          | 4443  | 0.76 | 42.96 | <i>Pisum sativum</i>        | 0.567 | 0.531 |       | 26.13 | 6  | 9  |    | 7  | 9 | 5 | 3 | 5 | 7 |  | Cultivated plants of unknown origin                      |
| <i>Dentaria bulbifera</i>                      | 3685  | 0.77 | 38.74 | <i>Epipremnum aureum</i>    | 0.472 | 0.581 |       | 35.65 | 4  | 6  | 3  | 3  | 5 | 4 | 5 | 7 | 6 |  | 49°11'40.602"N, 16°33'20.368"E                           |
| <i>Dentaria enneaphyllos</i>                   | 2484  | 0.55 | 41.06 | <i>Epipremnum aureum</i>    | 0.318 | 0.347 |       | 18.50 | 3  | 5  | 3  | 4  | 4 | 6 | 5 | 7 | 7 |  | 49°11'39.578"N, 16°33'23.041"E                           |
| <i>Dentaria glandulosa</i>                     | 1487  | 0.25 | 39.47 | <i>Solanum lycopersicum</i> | 0.877 | 0.844 |       | 30.32 | 4  | 5  | 3  | 4  | 4 | 6 | 6 | 5 | 7 |  | 49°35'25.426"N, 18°46'58.009"E                           |
| <i>Dentaria heptaphylla</i>                    | 2133  | 0.50 | 41.84 | <i>Solanum lycopersicum</i> | 1.257 | 1.069 |       | 26.71 | 4  | 6  | 3  | 3  | 5 | 4 | 5 | 8 | 6 |  | 46°25'55.80"N, 6°10'18.20"E                              |
| <i>Dicentra spectabilis</i>                    | 1174  | 0.09 | 41.85 | <i>Carex acutiformis</i>    | 1.467 | 1.116 |       | 32.69 | 4  | 5  | 2  |    |   |   |   |   |   |  | Botanical garden Masaryk Univ. Brno                      |
| <i>Dietes bicolor</i>                          | 14441 | 0.69 | 42.06 | <i>Epipremnum aureum</i>    | 1.848 | 1.914 |       | 15.84 |    |    |    |    |   |   |   |   |   |  | Cultivated plants of unknown origin                      |
| <i>Dioscorea tokoro</i>                        | 871   | 1.49 | 41.98 | <i>Ipomoea quamoclit</i>    | 0.703 | 0.590 |       | 25.94 |    |    |    |    |   |   |   |   |   |  | Praha-Trója Botanical Garden                             |
| <i>Dipcadi serotinum</i>                       | 6297  | 0.63 | 45.20 | <i>Pisum sativum</i>        | 0.803 | 0.663 | 2.05  | 31.62 | 4  | 6  |    | 11 | 8 | 3 | 1 | 4 | 2 |  | 37° 1'29.90"N, 8°56'46.08"W                              |
| <i>Disporum smithii</i>                        | 5411  | 0.52 | 46.10 | <i>Epipremnum aureum</i>    | 0.692 | 0.570 |       | 35.96 |    |    |    |    |   |   |   |   |   |  | Praha-Trója Botanical Garden                             |
| <i>Disporum uniflorum</i>                      | 49032 | 0.68 | 45.98 | <i>Vicia faba</i>           | 2.107 | 1.608 |       | 64.94 |    |    |    |    |   |   |   |   |   |  | Praha-Trója Botanical Garden                             |
| <i>Dodecatheon media</i>                       | 5461  | 0.51 | 39.96 | <i>Epipremnum aureum</i>    | 0.699 | 0.809 |       | 40.68 | 4  | 5  |    |    |   |   |   |   |   |  | Cultivated plants of unknown origin                      |
| <i>Doronicum hungaricum</i>                    | 7525  | 0.61 | 40.87 | <i>Vicia faba</i>           | 0.323 | 0.328 |       |       | 5  | 7  | 4  | 6  | 5 | 5 | 6 | 6 | 5 |  | Cultivated plants of unknown origin                      |
| <i>Dracaena deremensis</i>                     | 2470  | 0.97 | 44.05 | <i>Pisum sativum</i>        | 0.315 | 0.278 |       | 26.19 |    |    |    |    |   |   |   |   |   |  | Cultivated plants of unknown origin                      |
| <i>Dracunculus vulgaris</i>                    | 10343 | 0.47 | 44.06 | <i>Epipremnum aureum</i>    | 1.323 | 1.227 |       | 41.63 | 4  | 5  |    | 6  | 8 | 4 | 4 | 5 | 5 |  | 39°51'31.85"N, 26°19'16.61"E                             |
| <i>Drosera menziesii</i>                       | 936   | 0.73 | 41.31 | <i>Solanum lycopersicum</i> | 0.552 | 0.482 |       | 16.01 |    |    |    |    |   |   |   |   |   |  | Cultivated plants of unknown origin                      |
| <i>Drosera peltata</i>                         | 787   | 2.49 | 44.15 | <i>Solanum lycopersicum</i> | 0.464 | 0.347 |       | 24.71 |    |    |    |    |   |   |   |   |   |  | Cultivated plants of unknown origin                      |
| <i>Ecballium elaterium</i>                     | 2442  | 0.76 | 40.67 | <i>Pisum sativum</i>        | 0.311 | 0.330 |       |       | 5  | 10 |    | 7  | 8 | 5 | 3 | 5 | 3 |  | Botanical garden Masaryk Univ. Brno                      |
| <i>Eranthis cilicica</i>                       | 22145 | 2.45 | 42.91 | <i>Pisum sativum</i>        | 2.824 | 2.655 | 3.13  | 66.82 | 2  | 3  | 3  |    |   |   |   |   |   |  | Botanical garden Masaryk Univ. Brno                      |

|                                            |       |      |       |                             |       |       |        |       |   |   |   |   |   |   |   |   |   |                                     |
|--------------------------------------------|-------|------|-------|-----------------------------|-------|-------|--------|-------|---|---|---|---|---|---|---|---|---|-------------------------------------|
| <i>Eranthis hyemalis</i>                   | 22034 | 0.37 | 42.76 | <i>Pisum sativum</i>        | 2.810 | 2.662 | 2.37   | 53.08 | 2 | 3 | 3 | 4 | 5 | 5 | 4 | 6 | 8 | Botanical garden Masaryk Univ. Brno |
| <i>Erythronium dens-canis</i>              | 51850 | 0.48 | 44.37 | <i>Vicia faba</i>           | 2.228 | 1.867 |        |       | 3 | 4 | 2 | 5 | 5 | 6 | 3 | 6 | 8 | 45°18.364'N, 11°41.949'E            |
| <i>Eucharis amazonica</i>                  | 23968 | 2.13 | 40.48 | <i>Pisum sativum</i>        | 3.057 | 3.272 |        | 42.20 |   |   |   |   |   |   |   |   |   | Botanical garden Masaryk Univ. Brno |
| <i>Ferraria crispa</i>                     | 20262 | 1.00 | 37.87 | <i>Epipremnum aureum</i>    | 2.593 | 3.334 |        | 18.44 |   |   |   |   |   |   |   |   |   | Cultivated plants of unknown origin |
| <i>Ficaria calthifolia</i>                 | 12636 | 0.82 | 40.39 | <i>Epipremnum aureum</i>    | 1.617 | 1.829 |        | 49.55 | 9 | 3 | 3 | 4 | 5 | 5 | 6 | 7 | 7 | 48°50'59.607"N, 17°31'57.52"E       |
| <i>Ficaria verna</i> ssp. <i>bulbifera</i> | 28434 | 1.19 | 42.28 | <i>Vicia faba</i>           | 1.222 | 1.150 |        | 60.99 | 9 | 3 | 3 | 4 | 5 | 5 | 6 | 7 | 7 | 49°12'38.014"N, 16°34'43.779"E      |
| <i>Fritillaria tubaeformis</i>             | 96717 | 0.45 | 37.32 | <i>Galanthus nivalis</i>    | 1.583 | 2.133 |        | 66.91 | 6 | 7 |   | 8 | 4 | 4 | 3 | 6 | 4 | 43°42'24.29"N, 6°51'40.11"E         |
| <i>Gagea bohemica</i>                      | 15309 | 1.61 | 46.19 | <i>Vicia faba</i>           | 0.658 | 0.496 |        | 42.71 | 3 | 4 | 1 | 9 | 8 | 5 | 2 | 8 | 1 | 48°50'16.288"N, 16°7'24.534"E       |
| <i>Gagea chrysantha</i>                    | 17773 | 0.34 | 45.08 | <i>Vicia faba</i>           | 0.764 | 0.614 |        |       | 3 | 4 |   | 9 | 4 | 3 | 3 | 4 | 3 | 41°46.151'N, 15°58.735'E            |
| <i>Gagea lutea</i>                         | 38757 | 0.60 | 45.98 | <i>Vicia faba</i>           | 1.665 | 1.271 | 4.09   | 79.76 | 3 | 5 | 1 | 2 | 4 | 4 | 6 | 7 | 7 | 49°13'1.824"N, 16°40'51.547"E       |
| <i>Gagea pusilla</i>                       | 12201 | 0.36 | 46.96 | <i>Vicia faba</i>           | 0.524 | 0.377 |        | 44.43 | 3 | 4 | 1 | 4 | 4 | 4 | 3 | 4 | 4 | 48°50'16.288"N, 16°7'24.534"E       |
| <i>Galanthus elwesii</i>                   | 47456 | 0.96 | 41.72 | <i>Vicia faba</i>           | 2.039 | 1.978 |        | 61.67 | 3 | 4 | 2 |   |   |   |   |   |   | Cultivated plants of unknown origin |
| <i>Galanthus nivalis</i>                   | 61089 | 0.30 | 43.07 | <i>Vicia faba</i>           | 2.625 | 2.366 |        | 44.97 | 3 | 4 | 2 | 5 | 7 | 4 |   | 7 | 7 | Botanical garden Masaryk Univ. Brno |
| <i>Galtonia candicans</i>                  | 12038 | 0.60 | 41.77 | <i>Epipremnum aureum</i>    | 1.540 | 1.620 | 7.24   | 60.81 |   |   |   |   |   |   |   |   |   | Cultivated plants of unknown origin |
| <i>Geranium tuberosum</i>                  | 2424  | 0.52 | 41.90 | <i>Solanum lycopersicum</i> | 1.429 | 1.211 |        |       | 2 | 5 |   | 7 | 7 | 6 | 3 | 3 | 3 | 36°54'56.98"N, 30° 3'31.48"E        |
| <i>Gloriosa superba</i>                    | 8773  | 0.38 | 46.31 | <i>Vicia faba</i>           | 0.377 | 0.282 |        | 42.04 |   |   |   |   |   |   |   |   |   | Cultivated plants of unknown origin |
| <i>Hacquetia epipactis</i>                 | 2692  | 0.53 | 39.39 | <i>Epipremnum aureum</i>    | 0.344 | 0.410 |        | 23.91 | 3 | 5 | 7 | 4 | 4 | 7 | 4 | 7 | 4 | 49°15'1.645"N, 17°39'56.842"E       |
| <i>Haemanthus albiflos</i>                 | 57842 | 0.31 | 38.76 | <i>Vicia faba</i>           | 2.485 | 2.811 |        | 63.15 |   |   |   |   |   |   |   |   |   | Cultivated plants of unknown origin |
| <i>Helleborus foetidus</i>                 | 20557 | 0.84 | 40.69 | <i>Epipremnum aureum</i>    | 2.630 | 2.931 | 11.36  | 41.32 | 1 | 4 | 5 | 5 | 6 | 4 | 4 | 8 | 3 | 39°37.233'N, 15°55.297'E            |
| <i>Helleborus lividus</i>                  | 16628 | 0.86 | 39.23 | <i>Pisum sativum</i>        | 2.121 | 2.422 |        |       | 1 | 4 | 5 | 5 | 6 | 4 | 4 | 4 | 6 | Botanical garden Masaryk Univ. Brno |
| <i>Helleborus purpurascens</i>             | 27240 | 1.10 | 39.72 | <i>Pisum sativum</i>        | 3.474 | 3.868 |        |       | 3 | 4 |   | 4 | 6 | 6 | 5 | 7 | 4 | Botanical garden Masaryk Univ. Brno |
| <i>Helleborus viridis</i>                  | 26717 | 0.67 | 39.94 | <i>Vicia faba</i>           | 1.148 | 1.223 | 9.69   |       | 2 | 4 | 4 | 3 | 6 | 4 | 5 | 8 | 5 | 45°25.292'N, 11°30.902'E            |
| <i>Hermodactylus tuberosus</i>             | 23351 | 0.65 | 42.92 | <i>Pisum sativum</i>        | 2.978 | 2.798 |        |       | 2 | 3 |   | 7 | 7 | 5 | 3 | 5 | 3 | 39°21.120'N, 16°11.009'E            |
| <i>Hippeastrum</i> sp.                     | 52786 | 1.05 | 39.64 | <i>Vicia faba</i>           | 2.268 | 2.453 | 12.70  | 60.06 |   |   |   |   |   |   |   |   |   | Cultivated plants of unknown origin |
| <i>Hosta lancifolia</i>                    | 18025 | 1.60 | 41.52 | <i>Epipremnum aureum</i>    | 2.306 | 2.459 |        | 29.98 | 5 | 6 |   |   |   |   |   |   |   | Botanical garden Masaryk Univ. Brno |
| <i>Hosta minor</i>                         | 14901 | 1.03 | 41.82 | <i>Epipremnum aureum</i>    | 1.907 | 2.000 |        | 23.01 | 5 | 6 |   |   |   |   |   |   |   | Botanical garden Masaryk Univ. Brno |
| <i>Hymenocallis festalis</i>               | 63102 | 1.47 | 37.80 | <i>Vicia faba</i>           | 2.711 | 3.217 |        | 59.49 |   |   |   |   |   |   |   |   |   | Cultivated plants of unknown origin |
| <i>Impatiens omeiensis</i>                 | 6378  | 0.48 | 39.02 | <i>Pisum sativum</i>        | 0.813 | 0.939 |        | 35.66 |   |   |   |   |   |   |   |   |   | Praha-Trója Botanical Garden        |
| <i>Ipheion uniflorum</i>                   | 17071 | 0.53 | 38.56 | <i>Epipremnum aureum</i>    | 2.184 | 2.713 | 2.06   | 33.30 | 4 | 5 |   |   |   |   |   |   |   | Cultivated plants of unknown origin |
| <i>Iris aphylla</i> ssp. <i>hungarica</i>  | 20120 | 3.22 | 42.02 | <i>Epipremnum aureum</i>    | 2.574 | 2.671 |        | 19.38 | 4 | 5 | 8 | 7 | 7 | 6 | 2 | 4 | 1 | 48°21'33.80"N, 21°47'12.70"E        |
| <i>Iris foetidissima</i>                   | 14173 | 0.94 | 42.68 | <i>Epipremnum aureum</i>    | 1.814 | 1.815 |        | 25.58 | 5 | 8 |   | 7 | 7 | 5 | 4 | 4 | 5 | 43°32'8.70"N, 4°38'41.90"E          |
| <i>Iris palaestina</i>                     | 20302 | 0.97 | 39.97 | <i>Epipremnum aureum</i>    | 2.598 | 3.004 |        | 32.60 |   |   |   |   |   |   |   |   |   | 32° 45' 17.5"N, 35° 1' 43.1"E       |
| <i>Iris pumila</i>                         | 20845 | 1.09 | 41.70 | <i>Epipremnum aureum</i>    | 2.667 | 2.817 | 14.23  | 21.62 | 4 | 5 | 8 |   |   |   |   |   |   | 49°13'6.80"N 16°40'32.10"E          |
| <i>Iris sibirica</i>                       | 8770  | 2.06 | 42.00 | <i>Solanum lycopersicum</i> | 5.169 | 4.358 | 11.86  |       | 5 | 6 | 8 | 7 | 6 | 5 | 6 | 4 | 4 | Cultivated plants of unknown origin |
| <i>Iris variegata</i>                      | 10889 | 0.82 | 42.78 | <i>Epipremnum aureum</i>    | 1.393 | 1.387 |        | 24.40 | 5 | 6 | 8 | 7 | 7 | 6 | 3 | 5 | 4 | 49°12'59.921"N, 16°40'12.501"E      |
| <i>Isopyrum thalictroides</i>              | 854   | 1.04 | 39.61 | <i>Solanum lycopersicum</i> | 0.503 | 0.481 |        |       | 3 | 4 | 2 | 5 | 5 | 5 | 6 | 6 | 7 | 49°13'40.379"N, 16°40'0.688"E       |
| <i>Jatropha podagrica</i>                  | 586   | 0.90 | 38.15 | <i>Carex acutiformis</i>    | 0.733 | 0.675 | 159.85 | 18.03 |   |   |   |   |   |   |   |   |   | Cultivated plants of unknown origin |
| <i>Jeffersonia diphylla</i>                | 3445  | 1.08 | 41.11 | <i>Epipremnum aureum</i>    | 0.441 | 0.480 |        | 31.95 |   |   |   |   |   |   |   |   |   | Botanical garden Masaryk Univ. Brno |
| <i>Jeffersonia dubia</i>                   | 2691  | 0.08 | 42.19 | <i>Epipremnum aureum</i>    | 0.344 | 0.354 |        | 30.58 |   |   |   |   |   |   |   |   |   | Botanical garden Masaryk Univ. Brno |
| <i>Kedrostis africana</i>                  | 1674  | 0.52 | 38.82 | <i>Ipomoea quamoclit</i>    | 1.352 | 1.338 |        | 47.58 |   |   |   |   |   |   |   |   |   | Botanical garden Masaryk Univ. Brno |
| <i>Kniphofia uvaria</i>                    | 26912 | 0.34 | 43.30 | <i>Ruscus aculeatus</i>     | 1.336 | 1.270 | 3.44   | 55.60 |   |   |   |   |   |   |   |   |   | Cultivated plants of unknown origin |
| <i>Lathyrus aureus</i>                     | 11711 | 0.28 | 42.27 | <i>Pisum sativum</i>        | 1.494 | 1.454 |        | 19.44 | 4 | 5 |   |   |   |   |   |   |   | 41° 1'50.74"N, 32° 5'3.49"E         |
| <i>Lathyrus laxiflorus</i>                 | 16419 | 1.16 | 40.81 | <i>Pisum sativum</i>        | 2.094 | 2.203 |        | 32.58 | 6 | 8 |   | 6 | 5 | 6 | 3 | 3 | 2 | 37°48'4.13"N, 30°51'36.80"E         |
| <i>Lathyrus niger</i>                      | 11770 | 0.69 | 40.91 | <i>Pisum sativum</i>        | 1.501 | 1.572 | 16.95  | 28.26 | 5 | 6 | 7 | 5 | 7 | 4 | 3 |   | 3 | 49°13'15.757"N, 16°40'10.823"E      |
| <i>Lathyrus tuberosus</i>                  | 12058 | 0.26 | 41.13 | <i>Pisum sativum</i>        | 1.538 | 1.591 | 32.05  | 29.26 | 5 | 6 | 6 | 7 | 6 | 6 | 4 | 8 | 4 | 49°12'46.672"N, 16°34'55.363"E      |
| <i>Lathyrus venetus</i>                    | 11378 | 0.46 | 41.35 | <i>Pisum sativum</i>        | 1.451 | 1.484 | 14.97  | 29.54 | 4 | 5 | 8 | 4 | 7 | 6 | 5 | 7 | 7 | 41°51.801'N, 16°02.661'E            |
| <i>Lathyrus vernus</i>                     | 10268 | 0.48 | 41.30 | <i>Pisum sativum</i>        | 1.309 | 1.343 | 16.73  | 33.81 | 4 | 5 | 8 | 4 | 4 | 5 | 4 | 7 |   | 49°13'6.118"N, 16°40'50.741"E       |
| <i>Ledebouria petiolata</i>                | 30243 | 1.31 | 44.36 | <i>Pisum sativum</i>        | 3.857 | 3.342 |        | 48.47 |   |   |   |   |   |   |   |   |   | Cultivated plants of unknown origin |
| <i>Leucojum aestivum</i>                   | 61563 | 0.06 | 42.33 | <i>Vicia faba</i>           | 2.645 | 2.483 | 50.37  | 50.92 | 4 | 5 | 4 | 6 | 5 | 4 | 7 | 7 | 7 | Botanical garden Masaryk Univ. Brno |
| <i>Leucojum vernum</i>                     | 68708 | 0.84 | 42.17 | <i>Vicia faba</i>           | 2.952 | 2.795 | 16.56  | 61.42 | 3 | 4 | 2 | 6 | 5 | 5 | 7 | 7 | 7 | Botanical garden Masaryk Univ. Brno |
| <i>Lilium martagon</i>                     | 76416 | 0.62 | 38.67 | <i>Leucojum aestivum</i>    | 1.241 | 1.502 | 5.02   | 81.78 | 6 | 7 | 5 | 5 |   | 5 | 4 | 7 | 5 | 49°13'16.842"N, 16°40'14.753"E      |
| <i>Limodorum abortivum</i>                 | 38101 | 0.99 | 43.09 | <i>Pisum sativum</i>        | 4.859 | 4.521 |        | 58.96 | 5 | 7 | 3 |   | 7 | 5 | 4 | 8 | 0 | 48°56'37.03"N 16°51'3.20"E          |
| <i>Liriope muscari</i>                     | 19927 | 0.57 | 41.12 | <i>Epipremnum aureum</i>    | 2.550 | 2.777 |        | 21.02 |   |   |   |   |   |   |   |   |   | Praha-Trója Botanical Garden        |
| <i>Maianthemum bifolium</i>                | 26103 | 2.04 | 42.71 | <i>Ruscus aculeatus</i>     | 1.296 | 1.273 |        | 38.65 | 6 | 7 | 6 | 3 |   | 6 |   | 3 | 3 | 49°11'39.865"N, 16°33'25.818"E      |

|                                                      |        |      |       |                             |       |       |        |       |    |    |    |    |    |   |   |   |   |                                     |
|------------------------------------------------------|--------|------|-------|-----------------------------|-------|-------|--------|-------|----|----|----|----|----|---|---|---|---|-------------------------------------|
| <i>Maianthemum racemosum</i>                         | 51539  | 0.39 | 42.77 | <i>Ruscus aculeatus</i>     | 2.559 | 2.504 | 33.31  |       |    |    |    |    |    |   |   |   |   | Praha-Trója Botanical Garden        |
| <i>Maianthemum stellatum</i>                         | 24054  | 2.33 | 40.75 | <i>Epipremnum aureum</i>    | 3.078 | 3.418 | 33.01  | 6     | 7  |    |    |    |    |   |   |   |   | Botanical garden Masaryk Univ. Brno |
| <i>Mercurialis perennis</i>                          | 6298   | 0.59 | 37.50 | <i>Solanum lycopersicum</i> | 3.712 | 3.943 | 32.30  | 4     | 5  | 6  | 2  | 5  | 4  |   | 7 | 7 |   | 49°11'36.763"N, 16°33'25.906"E      |
| <i>Mirabilis jalapa</i>                              | 2329   | 2.60 | 39.19 | <i>Pisum sativum</i>        | 0.297 | 0.340 | 63.76  | 5     | 10 | 7  | 6  | 7  | 5  | 4 |   |   |   | Botanical garden Masaryk Univ. Brno |
| <i>Muscari azureum</i>                               | 9437   | 1.28 | 47.73 | <i>Vicia faba</i>           | 0.405 | 0.278 | 4.15   | 38.38 | 4  | 5  |    |    |    |   |   |   |   | Cultivated plants of unknown origin |
| <i>Muscari comosum</i>                               | 10535  | 1.46 | 47.04 | <i>Vicia faba</i>           | 0.453 | 0.324 | 9.11   | 39.91 | 4  | 6  | 4  | 7  | 8  | 5 | 3 | 7 | 0 | 49°13'16.353"N, 16°40'28.382"E      |
| <i>Muscari tenuiflorum</i>                           | 9730   | 0.61 | 48.13 | <i>Vicia faba</i>           | 0.418 | 0.280 | 5.74   | 37.22 | 4  | 6  | 4  | 7  | 8  | 6 | 3 | 8 | 0 | 48°51'53.135"N, 16°38'35.794"E      |
| <i>Narcissus bulbocodium</i>                         | 24987  | 0.54 | 43.14 | <i>Pisum sativum</i>        | 3.187 | 2.958 |        | 38.50 | 3  | 5  |    |    |    |   |   |   |   | 37° 1'29.90"N, 8°56'46.08"W         |
| <i>Narcissus poëticus</i>                            | 22792  | 0.17 | 42.18 | <i>Epipremnum aureum</i>    | 2.916 | 3.001 |        | 34.98 | 4  | 5  |    | 8  | 4  | 5 | 5 |   | 0 | 41°44.360"N, 15°58.974'E            |
| <i>Narcissus tazetta</i>                             | 38747  | 0.71 | 43.70 | <i>Vicia faba</i>           | 1.665 | 1.448 | 5.44   |       | 3  | 5  |    | 8  | 8  | 4 | 4 | 5 | 4 | 39°20.732"N, 16°09.959'E            |
| <i>Neottia nidus-avis</i>                            | 33933  | 3.07 | 45.81 | <i>Vicia faba</i>           | 1.458 | 1.124 |        |       | 5  | 7  | 2  | 2  | 5  | 5 | 5 | 7 | 5 | 49°13'24.93"N, 16°40'25.57"E        |
| <i>Nerine bowdenii</i>                               | 28954  | 3.06 | 41.07 | <i>Vicia faba</i>           | 1.244 | 1.249 |        | 46.90 | 8  | 10 |    |    |    |   |   |   |   | Cultivated plants of unknown origin |
| <i>Ophiopogon planiscapus</i> var. <i>nigrescens</i> | 10706  | 0.08 | 42.89 | <i>Epipremnum aureum</i>    | 1.370 | 1.356 |        | 19.03 |    |    |    |    |    |   |   |   |   | Praha-Trója Botanical Garden        |
| <i>Ornithogalum exscapum</i>                         | 20884  | 0.71 | 45.16 | <i>Vicia faba</i>           | 0.897 | 0.719 |        | 41.84 | 2  | 4  |    | 11 | 9  | 5 | 2 | 6 | 2 | 39°17.168"N, 16°05.978'E            |
| <i>Ornithogalum montanum</i>                         | 24708  | 0.77 | 41.74 | <i>Epipremnum aureum</i>    | 3.161 | 3.330 |        | 37.21 | 4  | 5  |    | 7  | 5  | 4 | 3 | 6 | 2 | 41°43.767"N, 15°56.711'E            |
| <i>Ornithogalum pyramidale</i>                       | 14219  | 0.22 | 42.74 | <i>Epipremnum aureum</i>    | 1.819 | 1.815 |        |       | 4  | 5  | 4  | 9  | 8  | 6 | 2 | 6 | 2 | 46°38'53.60"N, 23°50'31.78"E        |
| <i>Oxalis corymbosa</i>                              | 719    | 1.12 | 38.87 | <i>Carex acutiformis</i>    | 0.899 | 0.799 |        | 22.32 | 1  | 12 |    |    |    |   |   |   |   | 43°31'20.59"N, 6°53'52.20"E         |
| <i>Paeonia mascula</i>                               | 62239  | 0.50 | 36.44 | <i>Vicia faba</i>           | 2.674 | 3.389 |        |       | 4  | 5  |    | 5  | 6  | 4 | 3 | 4 | 5 | 41°51.753"N, 16°02.396'E            |
| <i>Pancratium maritimum</i>                          | 49928  | 1.01 | 41.76 | <i>Vicia faba</i>           | 2.145 | 2.077 |        | 59.39 | 7  | 9  |    | 11 | 10 | 3 | 1 |   | 1 | 40°33.742"N, 14°53.850'E            |
| <i>Paris quadrifolia</i>                             | 95441  | 0.17 | 42.04 | <i>Leucojum aestivum</i>    | 1.550 | 1.574 |        | 67.57 | 6  | 7  | 5  | 3  |    |   | 6 | 7 | 6 | 49°9'42.023"N, 16°9'28.912"E        |
| <i>Passiflora lutea</i>                              | 2939   | 0.80 | 41.51 | <i>Epipremnum aureum</i>    | 0.376 | 0.401 |        | 19.51 |    |    |    |    |    |   |   |   |   | Praha-Trója Botanical Garden        |
| <i>Passiflora quadrangularis</i>                     | 4277   | 0.97 | 44.68 | <i>Pisum sativum</i>        | 0.545 | 0.464 |        | 27.19 |    |    |    |    |    |   |   |   |   | Botanical garden Masaryk Univ. Brno |
| <i>Phlomis tuberosa</i>                              | 3965   | 1.71 | 40.71 | <i>Epipremnum aureum</i>    | 0.507 | 0.565 |        |       | 5  | 7  | 10 | 8  | 7  | 8 | 3 | 8 | 1 | Botanical garden Masaryk Univ. Brno |
| <i>Pinellia pedatisecta</i>                          | 2396   | 1.41 | 45.99 | <i>Carex acutiformis</i>    | 2.996 | 1.805 |        | 33.93 |    |    |    |    |    |   |   |   |   | Praha-Trója Botanical Garden        |
| <i>Pinellia tripartita</i>                           | 6907   | 1.19 | 45.95 | <i>Epipremnum aureum</i>    | 0.884 | 0.735 |        | 42.43 |    |    |    |    |    |   |   |   |   | Praha-Trója Botanical Garden        |
| <i>Platanthera bifolia</i>                           | 19494  | 1.11 | 43.16 | <i>Epipremnum aureum</i>    | 2.494 | 2.433 |        | 45.39 | 5  | 7  | 4  | 6  |    | 5 | 5 | 7 |   | 49°17'17.179"N, 16°33'27.302"E      |
| <i>Podophyllum emodi</i>                             | 28762  | 0.81 | 42.33 | <i>Vicia faba</i>           | 1.236 | 1.160 | 41.97  | 53.01 |    |    |    |    |    |   |   |   |   | Botanical garden Masaryk Univ. Brno |
| <i>Polygonatum franchetii</i>                        | 60919  | 0.43 | 39.13 | <i>Vicia faba</i>           | 2.618 | 2.905 |        | 58.22 |    |    |    |    |    |   |   |   |   | Praha-Trója Botanical Garden        |
| <i>Polygonatum latifolium</i>                        | 17844  | 1.06 | 44.34 | <i>Vicia faba</i>           | 0.767 | 0.644 | 36.34  | 37.60 | 5  | 6  | 5  | 2  | 5  | 6 | 5 | 7 | 4 | Botanical garden Masaryk Univ. Brno |
| <i>Polygonatum multiflorum</i>                       | 16737  | 0.93 | 41.43 | <i>Epipremnum aureum</i>    | 2.142 | 2.295 | 35.15  | 24.01 | 5  | 7  | 5  | 2  | 5  | 5 | 5 | 7 | 4 | 49°11'39.865"N, 16°33'25.818"E      |
| <i>Polygonatum odoratum</i>                          | 19643  | 1.19 | 42.91 | <i>Epipremnum aureum</i>    | 2.513 | 2.484 | 7.88   | 22.72 | 4  | 6  | 5  | 7  | 5  | 5 | 3 | 7 | 3 | 49°13'17.633"N, 16°40'26.67"E       |
| <i>Polygonatum verticillatum</i>                     | 16541  | 1.27 | 45.27 | <i>Vicia faba</i>           | 0.711 | 0.566 |        |       | 5  | 7  | 5  | 4  | 4  | 4 | 5 | 4 |   | 49°38'53.899"N, 15°57'46.45"E       |
| <i>Puschkinia scilloides</i>                         | 12693  | 0.98 | 45.80 | <i>Epipremnum aureum</i>    | 1.624 | 1.362 | 3.87   |       | 4  | 5  | 2  |    |    |   |   |   |   | Cultivated plants of unknown origin |
| <i>Ranunculus bulbosus</i>                           | 10234  | 0.79 | 45.41 | <i>Vicia faba</i>           | 0.440 | 0.347 | 2.59   | 45.32 | 4  | 6  | 5  | 8  | 6  | 5 | 3 | 7 | 3 | 49°21'4.688"N, 16°24'56.094"E       |
| <i>Remusatia vivipara</i>                            | 4170   | 0.93 | 44.13 | <i>Epipremnum aureum</i>    | 0.534 | 0.493 |        | 28.92 |    |    |    |    |    |   |   |   |   | Praha-Trója Botanical Garden        |
| <i>Rohdea japonica</i>                               | 79509  | 0.51 | 44.83 | <i>Galanthus nivalis</i>    | 1.302 | 1.178 |        | 64.45 |    |    |    |    |    |   |   |   |   | Botanical garden Masaryk Univ. Brno |
| <i>Ruscus aculeatus</i>                              | 20137  | 0.38 | 42.37 | <i>Vicia faba</i>           | 0.865 | 0.810 | 201.27 | 31.90 | 2  | 4  | 12 | 4  | 8  | 5 | 4 | 5 | 5 | 41°51.784"N, 16°02.371'E            |
| <i>Ruscus hypoglossum</i>                            | 15854  | 1.41 | 41.81 | <i>Pisum sativum</i>        | 2.022 | 2.017 | 202.41 | 25.75 | 12 | 4  | 12 | 3  | 4  | 5 | 4 | 4 | 6 | 48°15'47.66"N, 17°11'58.67"E        |
| <i>Ruscus hypophyllum</i>                            | 16475  | 0.54 | 42.25 | <i>Pisum sativum</i>        | 2.101 | 2.048 |        | 32.93 |    |    |    |    |    |   |   |   |   | Cultivated plants of unknown origin |
| <i>Scilla bifolia</i>                                | 11438  | 0.63 | 46.26 | <i>Epipremnum aureum</i>    | 1.463 | 1.194 |        | 42.69 | 3  | 5  | 2  | 5  | 6  | 5 | 6 | 7 | 6 | 45°19.097"N, 11°41.419'E            |
| <i>Scilla luciliae</i>                               | 8850   | 3.25 | 48.22 | <i>Ruscus aculeatus</i>     | 0.439 | 0.313 | 8.02   |       | 4  | 5  | 2  |    |    |   |   |   |   | Cultivated plants of unknown origin |
| <i>Scilla siberica</i>                               | 60052  | 1.26 | 46.91 | <i>Vicia faba</i>           | 2.580 | 1.863 | 8.67   | 49.17 | 3  | 4  | 2  |    |    |   |   |   |   | Cultivated plants of unknown origin |
| <i>Scorzonera mollis</i>                             | 4810   | 1.06 | 39.07 | <i>Epipremnum aureum</i>    | 0.615 | 0.745 |        | 17.39 |    |    |    |    |    |   |   |   |   | 36.915828, 30.058744                |
| <i>Scrophularia nodosa</i>                           | 1352   | 1.09 | 41.10 | <i>Solanum lycopersicum</i> | 0.797 | 0.705 |        | 22.59 | 6  | 9  | 6  | 4  | 5  | 4 | 6 | 6 | 7 | 49°11'56.229"N, 16°32'30.76"E       |
| <i>Semele androgyna</i>                              | 11842  | 0.88 | 41.95 | <i>Pisum sativum</i>        | 1.510 | 1.496 |        | 34.63 |    |    |    |    |    |   |   |   |   | 28°33'30.60"N, 16°10'13.00"W        |
| <i>Simethis mattiazzi</i>                            | 7449   | 3.97 | 44.95 | <i>Ruscus aculeatus</i>     | 0.370 | 0.320 | 0.33   |       | 4  | 5  |    | 8  | 10 | 2 | 2 | 3 | 2 | 43°29'41.48"N, 6°55'37.77"E         |
| <i>Smilax aspera</i>                                 | 9340   | 2.89 | 43.92 | <i>Vicia faba</i>           | 0.401 | 0.345 | 36.60  |       | 9  | 11 |    | 6  | 10 | 4 | 2 | 5 | 3 | 43°56'55.57"N, 4°31'52.52"E         |
| <i>Smilax herbacea</i>                               | 3000   | 1.08 | 42.17 | <i>Epipremnum aureum</i>    | 0.384 | 0.395 |        | 29.96 |    |    |    |    |    |   |   |   |   | Praha-Trója Botanical Garden        |
| <i>Solanum tuberosum</i>                             | 3148   | 0.47 | 38.75 | <i>Solanum lycopersicum</i> | 1.855 | 1.853 |        | 22.46 | 6  | 8  |    | 7  | 7  |   | 5 | 5 |   | Cultivated plants of unknown origin |
| <i>Soldanella hungarica</i>                          | 3088   | 1.46 | 38.82 | <i>Epipremnum aureum</i>    | 0.395 | 0.485 |        | 30.22 | 5  | 6  |    | 5  | 4  | 5 | 6 | 2 | 2 | 45°24'26.93"N 22°50'24.20"E         |
| <i>Soldanella pusilla</i>                            | 12108  | 0.86 | 37.59 | <i>Epipremnum aureum</i>    | 1.549 | 2.019 |        | 37.39 | 6  | 7  |    | 8  | 1  | 5 | 6 | 2 | 2 | 45°23'24.90"N, 22°50'40.28"E        |
| <i>Spathicarpa sagittifolia</i>                      | 18544  | 0.34 | 42.08 | <i>Epipremnum aureum</i>    | 2.373 | 2.455 |        | 51.79 |    |    |    |    |    |   |   |   |   | Botanical garden Masaryk Univ. Brno |
| <i>Sprekelia formosissima</i>                        | 128273 | 0.63 | 38.59 | <i>Leucojum aestivum</i>    | 2.084 | 2.533 |        | 76.23 | 3  | 5  |    |    |    |   |   |   |   | Cultivated plants of unknown origin |
| <i>Sternbergia colchiciflora</i>                     | 39232  | 1.47 | 41.73 | <i>Vicia faba</i>           | 1.686 | 1.634 |        | 37.21 | 9  | 10 | 3  | 9  | 4  | 6 | 3 | 5 | 2 | 47°49'23.30"N, 18°38'26.20"E        |

|                                 |       |      |       |                             |       |       |       |       |    |    |   |    |    |   |   |   |                                       |                                       |
|---------------------------------|-------|------|-------|-----------------------------|-------|-------|-------|-------|----|----|---|----|----|---|---|---|---------------------------------------|---------------------------------------|
| <i>Sternbergia lutea</i>        | 46962 | 1.14 | 42.44 | <i>Vicia faba</i>           | 2.018 | 1.881 | 47.19 | 9     | 10 |    | 6 | 6  | 3  | 4 | 5 | 4 | Botanical garden Charles Univ. Prague |                                       |
| <i>Streptopus amplexifolius</i> | 11087 | 0.55 | 49.73 | <i>Ruscus aculeatus</i>     | 0.551 | 0.356 | 43.94 | 6     | 8  | 5  | 5 | 4  | 4  | 5 | 6 | 5 | 50°38'59.269"N, 15°51'40.352"E        |                                       |
| <i>Symphytum tuberosum</i>      | 1854  | 1.13 | 37.80 | <i>Carex acutiformis</i>    | 2.318 | 2.172 | 15.10 | 3     | 4  | 3  | 4 | 5  | 6  | 6 | 7 | 5 | 49°13'12.376"N, 16°40'48.024"E        |                                       |
| <i>Tamus communis</i>           | 1684  | 0.74 | 42.07 | <i>Carex acutiformis</i>    | 2.105 | 1.582 |       | 4     | 5  |    | 5 | 7  | 5  | 5 | 8 | 6 | 41°51.784'N, 16°02.371'E              |                                       |
| <i>Tofieldia calyculata</i>     | 1534  | 3.04 | 45.84 | <i>Oryza sativa</i>         |       |       |       |       |    |    |   |    |    |   |   |   | Botanical garden Charles Univ. Prague |                                       |
| <i>Tricyrtis hirta</i>          | 8051  | 1.00 | 40.58 | 'Nipponbare'                | 1.973 | 1.734 |       | 6     | 8  |    | 8 |    | 4  | 8 | 8 | 3 | Prague                                |                                       |
| <i>Tricyrtis macranthopsis</i>  | 7314  | 1.06 | 42.06 | <i>Vicia faba</i>           | 0.346 | 0.357 |       | 8     | 10 |    |   |    |    |   |   |   | Cultivated plants of unknown origin   |                                       |
| <i>Trientalis europaea</i>      | 5009  | 0.54 | 36.85 | <i>Ruscus aculeatus</i>     | 0.363 | 0.369 | 60.43 | 8     | 10 |    |   |    |    |   |   |   | Praha-Trója Botanical Garden          |                                       |
| <i>Triglochin bulbosa</i>       | 3453  | 1.69 | 42.50 | <i>Epipremnum aureum</i>    | 0.641 | 0.866 | 32.02 | 5     | 7  | 5  | 5 |    | 7  |   | 3 | 2 | 49°38'53.899"N, 15°57'46.45"E         |                                       |
| <i>Trillium albidum</i>         | 92478 | 0.24 | 42.28 | <i>Pisum sativum</i>        | 0.440 | 0.423 | 53.23 | 4     | 5  |    | 8 | 8  | 4  | 8 | 7 | 7 | 43°20'54.50"N, 4°47'22.30"E           |                                       |
| <i>Triteleia ixioides</i>       | 12592 | 0.44 | 45.54 | <i>Leucojum aestivum</i>    | 1.502 | 1.506 | 68.18 | 3     | 4  | 5  |   |    |    |   |   |   | Botanical garden Masaryk Univ. Brno   |                                       |
| <i>Urginea hesperia</i>         | 20610 | 1.97 | 41.13 | <i>Epipremnum aureum</i>    | 1.611 | 1.372 |       |       |    |    |   |    |    |   |   |   | Cultivated plants of unknown origin   |                                       |
| <i>Urginea maritima</i>         | 12895 | 0.24 | 44.84 | <i>Pisum sativum</i>        | 2.628 | 2.720 | 51.62 |       |    |    |   |    |    |   |   |   | 28°18'0.60"N, 16°22'24.20"W           |                                       |
| <i>Uvularia grandiflora</i>     | 31397 | 0.57 | 46.95 | <i>Pisum sativum</i>        | 1.645 | 1.386 | 3.50  | 50.79 | 9  | 10 |   | 11 | 10 | 3 | 1 | 4 | 2                                     | 41°54'2.97"N, 16° 8'22.51"E           |
| <i>Veratrum lobelianum</i>      | 6471  | 1.80 | 45.64 | <i>Ruscus aculeatus</i>     | 1.559 | 1.199 | 30.48 | 3     | 4  | 5  |   |    |    |   |   |   | Botanical garden Masaryk Univ. Brno   |                                       |
| <i>Veratrum nigrum</i>          | 4665  | 1.03 | 43.80 | <i>Epipremnum aureum</i>    | 0.828 | 0.701 |       | 6     | 7  | 5  | 7 | 4  | 5  | 3 | 0 | 6 | 50°38'45.519"N, 15°51'25.843"E        |                                       |
| <i>Carex acutiformis</i>        | 800   | 2.31 | 36.46 | <i>Epipremnum aureum</i>    | 0.597 | 0.562 | 7.70  | 48.01 | 6  | 7  | 5 | 4  | 6  | 5 | 3 | 6 | 5                                     | Botanical garden Masaryk Univ. Brno   |
| <i>Ipomoea quamoclit</i>        | 1238  | 0.29 | 38.61 | <i>Solanum lycopersicum</i> | 0.471 | 0.527 |       |       |    |    |   |    |    |   |   |   |                                       | Botanical garden Masaryk Univ. Brno   |
| <i>Solanum lycopersicum</i>     | 1697  | 2.24 | 38.72 | <i>Solanum lycopersicum</i> | 0.730 | 0.734 |       |       |    |    |   |    |    |   |   |   |                                       | www.rareplants.de                     |
| <i>Epipremnum aureum</i>        | 7923  | 0.34 | 43.73 | <i>Oryza sativa</i>         |       |       |       |       |    |    |   |    |    |   |   |   |                                       | Provided by J. Doležel lab in Olomouc |
|                                 |       |      |       | 'Nipponbare'                | 0.458 | 0.354 |       |       |    |    |   |    |    |   |   |   |                                       | Cultivated plants of unknown origin   |
|                                 |       |      |       | <i>Vicia faba</i>           | 0.340 | 0.296 |       |       |    |    |   |    |    |   |   |   |                                       | Cultivated plants of unknown origin   |

CV genome size [%] – coefficient of variation for genome size estimation

Used standard – standard used in measurements

Ratio PI – mean ratio of sample and standard peaks in measurements with Propidium iodide

Ratio DAPI – mean ratio of sample and standard peaks in measurements with DAPI

Flowering – black numbers are original; red numbers are our approximations – see Methods in the main text

EIV – Pignatti's Ecological Indicator Values
